# Supplementary material
Source: Research Square preprint supplement (doi:10.21203/rs.3.rs-9160520/v1)
Supplement: Supplementary file 1 [file e6aa8b62d9f5cd49d5969c03.docx]

**Supplemental appendix**

**Human epithelial tooth organoids model disrupted amelogenesis following environmental and therapeutic exposures**

Steffie Hasevoets1*, Florian Hermans1, Joeri Meyns2,3, Hugo Vankelecom4, Heidi Declercq5, Esther Wolfs1, Ivo Lambrichts1, Annelies Bronckaers1

*1Biomedical Research Institute (BIOMED), Faculty of Medicine and Life Sciences, Hasselt University, 3590 Diepenbeek, Belgium*

*2Department of Oral and Maxillofacial Surgery, General Hospital St-Jan, Synaps Park 1, 3600 Genk, Belgium*

*3LCRC, Faculty of Medicine and Life Sciences, Hasselt University, 3590 Diepenbeek, Belgium*

*4Laboratory of Tissue Plasticity in Health and Disease, Cluster of Stem Cell and Developmental Biology, Department of Development and Regeneration, KU Leuven, 3000 Leuven, Belgium.*

*5Tissue Engineering Lab, Department of Development and Regeneration, KU Leuven campus KULAK, 8500 Kortrijk, Belgium*

*Corresponding author

1. **Supplemental Figures**
2. **Supplemental Tables**
3. **Supplemental Figures**

**
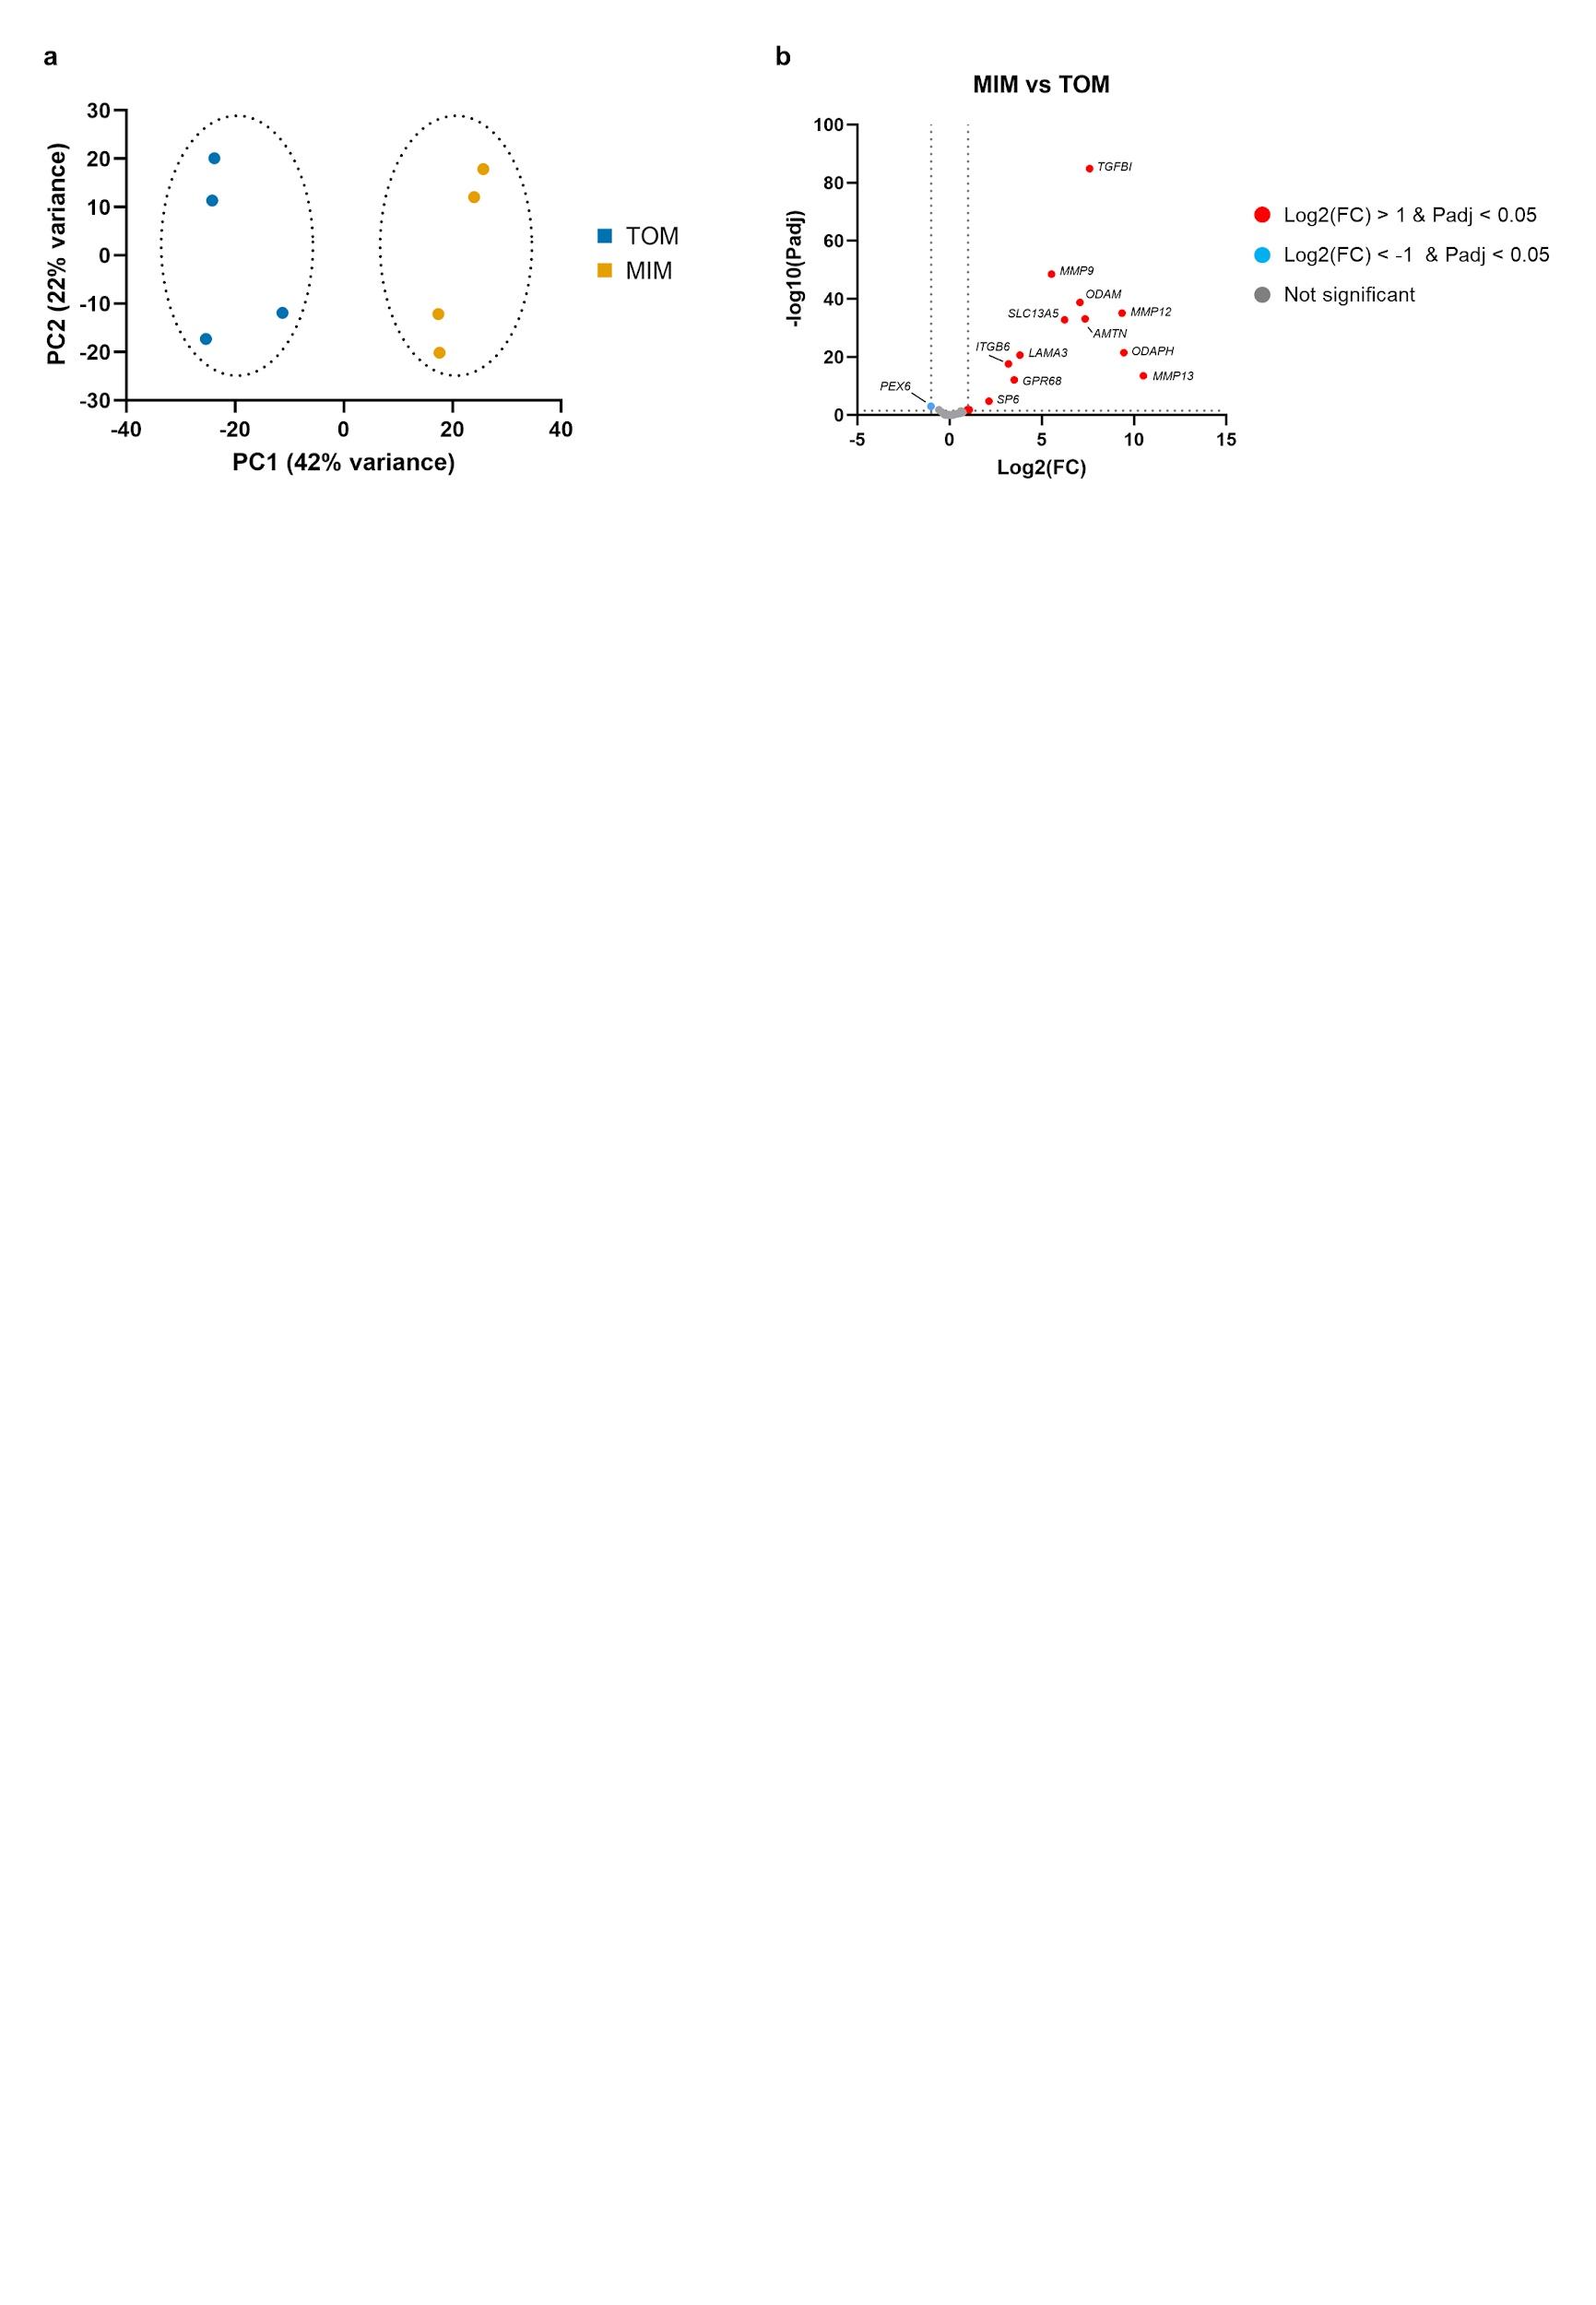
Supplemental Figure 1: RNA-seq analysis of ETOs grown in TOM or MIM conditions demonstrates ameloblast-like differentiation. (a)** PCA plot showing clear separation between TOM and MIM samples. **(b)** Volcano plot highlighting differentially expressed genes from the GSEA ‘amelogenesis’ and ‘amelogenesis imperfecta’ gene sets, indicates overall upregulation of amelogenesis-associated genes in MIM compared to TOM (n = 4 biological replicates).


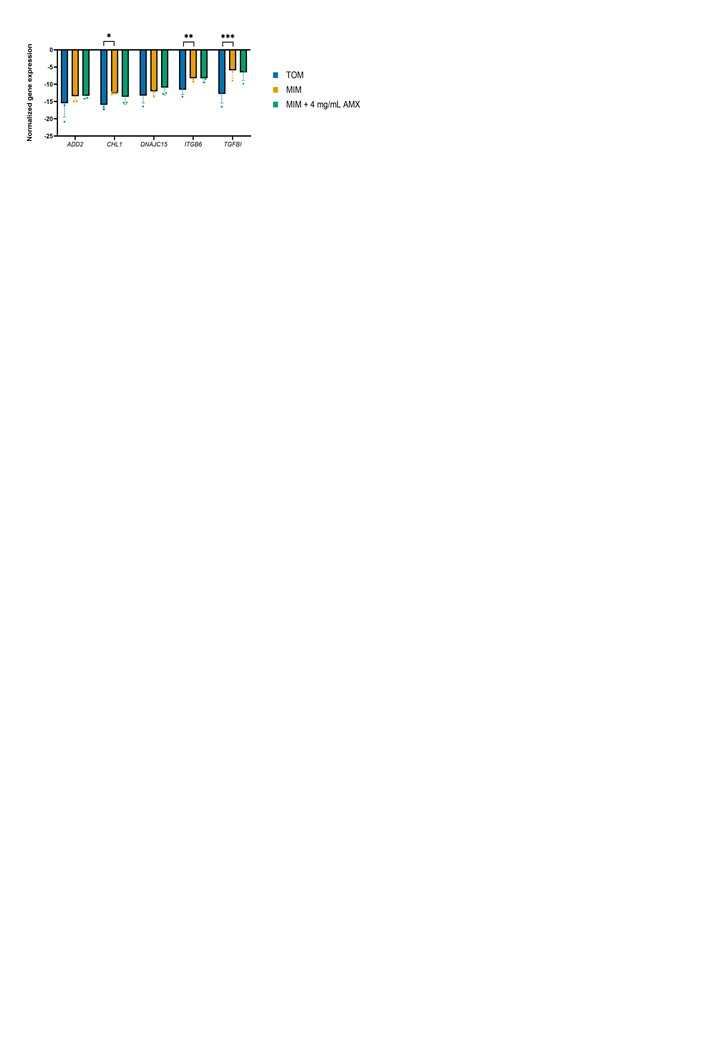


**Supplemental Figure 2: Validation of candidate genes from RNA-seq analysis with qRT-PCR. (a)** Normalized gene expression levels of *ADD2, CHL1, DNAJC15, ITGB6, TGFBI.* Data are presented as mean ± SEM. Statistical analyses were performed as described in Materials and Methods (*P* ≤ 0.05) (n = 4 biological replicates).


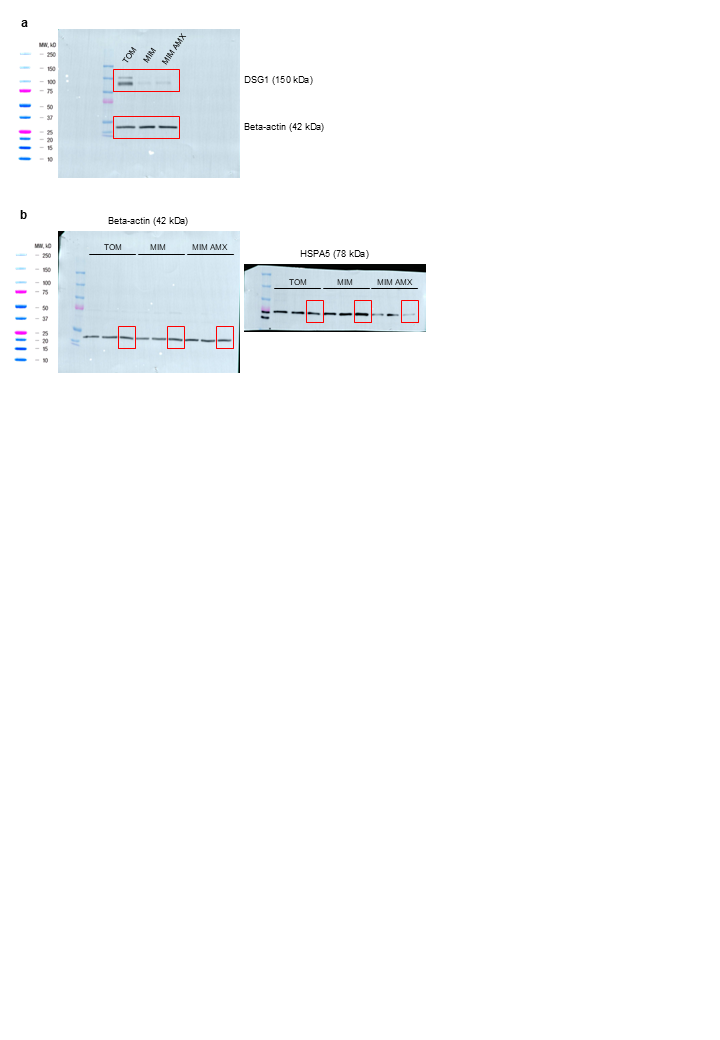


**Supplemental Figure 3: Full-length western blots corresponding to AMX-treated samples.** (**a**) Representative full western blot showing β-actin (~42 kDa) and DSG1 (~150 kDa). (**b**) Representative full western blots showing β-actin and HSPA5 (~78 kDa). Red boxes indicate the regions that were cropped and presented in the main figures.

**
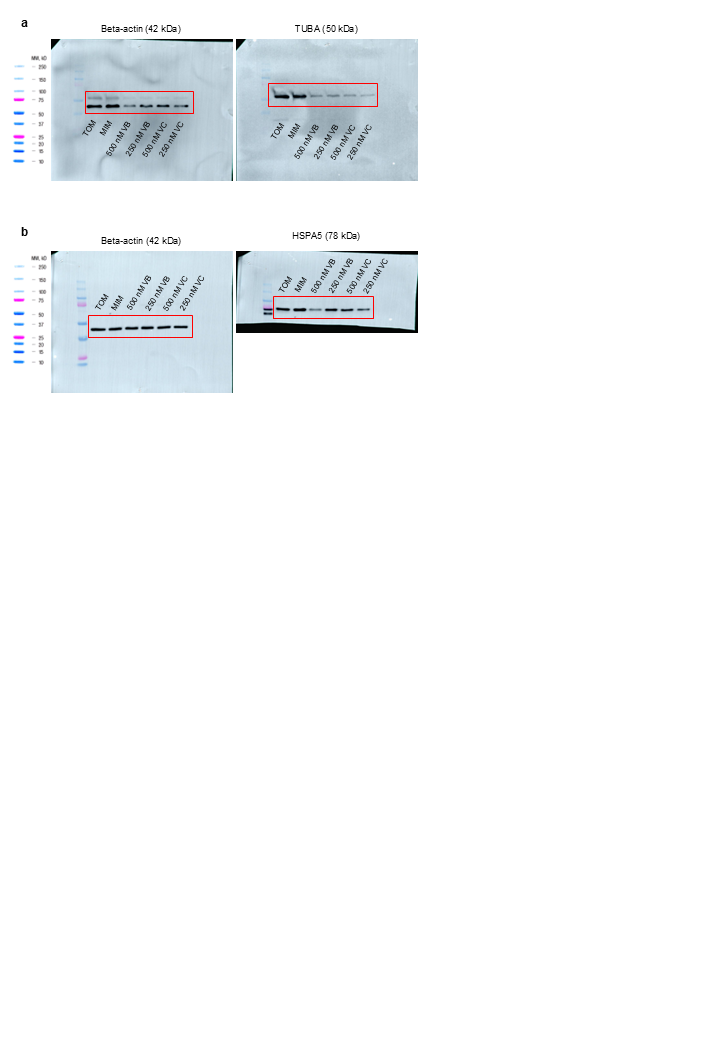
**

**Supplemental Figure 3: Full-length western blots corresponding to VB and VC-treated samples.** (**a**) Representative full western blot showing β-actin (~42 kDa) and TUBA (~50 kDa). (**b**) Representative full western blots showing β-actin and HSPA5 (~78 kDa). Red boxes indicate the regions that were cropped and presented in the main figures.

1. **Supplemental Tables**

**Supplemental Table 1 – Patient list of produced organoid lines**

| **Patient number** | **Age** | **Gender** |
| --- | --- | --- |
| P55 | 15 | Male |
| P56 | 16 | Male |
| P61 | 17 | Female |
| P62 | 19 | Male |
| P70 | 16 | Male |
| P72 | 13 | Male |
| P73 | 17 | Female |
| P77 | 15 | Female |
| P78 | 19 | Female |
| P79 | 16 | Male |
| P81 | 17 | Female |
| LP82 | 15 | Female |
| P84 | 15 | Female |
| P85 | 14 | Female |
| P87 | 15 | Male |
| P88 | 17 | Female |
| P111 | 18 | Male |
| LP135 | 16 | Female |

**Supplemental Table 2 – Composition of collection medium**

| **Product** | **Concentration** | **Supplier** | **Catalogue Number** |
| --- | --- | --- | --- |
| αMEM |  | Sigma-Aldrich | M4526 |
| FCS | 10% | Sigma-Aldrich | F7524 |
| Pen/Strep | 1% | Gibco | 15140-122 |
| Amphotericin B | 0.5% | Gibco | 15290018 |

**Supplemental Table 3 – Composition of dissociation medium**

| **Product** | **Concentration** | **Supplier** | **Catalogue Number** |
| --- | --- | --- | --- |
| PBS |  | Gibco | 10010-015 |
| Collagenase IV | 3 mg/mL | Gibco | 17104-019 |
| Dispase II | 4 mg/mL | Sigma-Aldrich | D4693 |

**Supplemental Table 4 – Composition of medium A**

| **Product** | **Concentration** | **Supplier** | **Catalogue Number** |
| --- | --- | --- | --- |
| DMEM high glucose |  | Gibco | 52100039 |
| HEPES | 1% | Sigma-Aldrich | H4034 |
| Pen/Strep | 1% | Gibco | 15140-122 |
| BSA | 3 g/L | PAN-Biotech | 47330.03 |
| DNase | 0.4 mg/mL | Sigma-Aldrich | D5025-15KU |

**Supplemental Table 5 – Composition of SFDM, prepared with a pH of 7.3**

| **Product** | **Concentration** | **Supplier** | **Catalogue Number** |
| --- | --- | --- | --- |
| Water suitable for cell culture |  | Capricorn Scientific | WAT-1000ML |
| DMEM 1:1 F12 without FE | 16.8 g/L | Invitrogen | 074-90715A |
| Transferrin | 5 mg/L | Serva | 36760.01 |
| Insulin from bovine pancreas | 5 mg/L | Sigma-Aldrich | I6634 |
| Penicillin | 35 mg/L | Sigma-Aldrich | P3032 |
| Streptomycin | 50 mg/L | Sigma-Aldrich | S6501 |
| Ethanol absolute (≥ 99.8%) | 600 µl/L | Fisher chemical | E/0650DF/15 |
| Catalase from bovine liver | 50 µl/L | Sigma-Aldrich | C100 |
| NaHCO3 | 1 g/L | Merck | 106329 |
| BSA | 5 g/L | Serva | 47330.03 |

**Supplemental Table 6 – Composition of TOM**

| **Product** | **Concentration** | **Supplier** | **Catalogue Number** |
| --- | --- | --- | --- |
| SFDM | See Supplemental Table 5 | | |
| A83-01 | 0.5 µM | Sigma-Aldrich | SML0788 |
| B27 (without vitamin A) | 2% | Gibco | 12587-010 |
| Cholera Toxin | 100 ng/mL | Sigma-Aldrich | C8052 |
| FGF2 | 20 ng/mL | Biotechne | 234-FSE |
| FGF8 | 200 ng/mL | PeproTech | AF-100-25 |
| FGF10 | 100 ng/mL | PeproTech | 100-26 |
| Glutamax | 2 mM | Gibco | 35050061 |
| IGF-1 | 100 ng/mL | PeproTech | 100-11 |
| N-acetyl-L-cysteine | 1.25 mM | Sigma-Aldrich | A7250 |
| Nicotinamide | 10 mM | Sigma-Aldrich | N0636 |
| Noggin | 100 ng/mL | PeproTech | 120-10C |
| RSPO1 | 200 ng/mL | PeproTech | 120-38 |
| SB202190 | 10 µM | Biotechne | 1264/10 |
| SHH | 100 ng/mL | Biotechne | 464-SH |
| WNT3A | 200 ng/mL | Biotechne | 5036-WN |

**Supplemental Table 7 – Composition of MIM**

| **Product** | **Concentration** | **Supplier** | **Catalogue Number** |
| --- | --- | --- | --- |
| KBM |  | Lonza | CC-3104 |
| Calcium Chloride | 0.09 mM | Thermo Fisher Scientific | 349610250 |
| EGF | 1 ng/mL | Biotechne | 236-EG |
| Bovine Pituitary Extract | 50 µg/mL | Thermo Fisher Scientific | 11568866 |
| **Tested supplements in MIM** | | | |
| Amoxicillin | 0.1 – 4 mg/mL | Sigma-Aldrich | A8523 |
| Bisphenol A | 0.4 – 30 µg/mL | Merck | 239658 |
| Vinblastine | 25 – 500 nM | Thermo Fisher Scientific | 203450050 |
| Vincristine | 25 – 500 nM | Thermo Fisher Scientific | 203440050 |

**Supplemental Table 8 – Sequences of forward and reverse primers used in quantitative qRT-PCR**

| **Gene** | **Forward primer (5’-3’)** | **Reverse primer (5’-3)** |
| --- | --- | --- |
| *AMTN* | TGTCTTCTAGGATCAACTCGGT | TGGTTTGGTAGTGTTCCCTGA |
| *CycA* | AGACTGAGTGGTTGGATGGC | TCGAGTTGTCCACAGTCAGC |
| *DSG1* | CTGCTGGCATTGGACTCCTCAT | CATTCGGGAACAGGCTCAAAGC |
| *DSPP* | TGGCGATGCAGGTCACAAT | CCATTCCCACTAGGACTCCCA |
| *HSPA5* | CATCACGCCGTCCTATGTCG | CGTCAAAGACCGTGTTCTCG |
| *OCLN* | ACAAGCGGTTTTATCCAGAGTC | GTCATCCACAGGCGAAGTTAAT |
| *ODAM* | CAGGCCAAGTTGATCCCTTA | GAGGTTGTTCCCAGGGTAG |
| *TUBA* | CGGGCAGTGTTTGTAGACTTGG | CTCCTTGCCAATGGTGTAGTGC |
| *VWDE* | ACTGCTGTCTCTTTCAAATCCC | CCGCACAGTAGCCCATACAT |

**Supplemental Table 9 – Antibodies used for Western blot**

| **Target** | **Host** | **Dilution** | **Supplier** | **Catalogue Number** |
| --- | --- | --- | --- | --- |
| **Primary antibodies** | | | | |
| AMELX | Mouse | 1:1000 | Santa-Cruz | sc-365284 |
| ꞵ-actin | Mouse | 1:1000 | Santa-Cruz | sc-47778 |
| DSG1 | Rabbit | 1:1000 | ProteinTech | 24587-1-AP |
| HSPA5 | Rabbit | 1:1000 | ProteinTech | 11587-1-AP |
| TUBA | Rat | 1:1000 | Novus Biologicals | NB600-506 |
| **Secondary antibodies** | | | | |
| HRP-labeled anti-mouse | Rabbit | 1:2000 | Dako | P0260 |
| HRP-labeled anti-rabbit | Goat | 1:2000 | Dako | P0448 |
| HRP-labeled anti-rat | Rabbit | 1:5000 | Abcam | AB6734 |
